# Supplementary material for: The Stabilization of S100A9 Structure by Calcium Inhibits the Formation of Amyloid Fibrils
Source: MDPI journal article supplement (doi:10.3390/ijms241713200), 2023-08-25
Supplement: s1 [file s1]

## **Supplementary Material**

### **The stabilization of S100A9 structure by calcium inhibits the formation of amyloid fibrils.**

Ella Sanders<sup>1</sup>, Rebecca Csondor<sup>1</sup>, Darius Šulskis<sup>2</sup>, Ieva Baronaitė<sup>2</sup>, Vytautas Smirnovas<sup>2</sup>,  
Luckshi Mahesewaran<sup>1</sup>, Jack Horrocks<sup>1</sup>, Rory Munro<sup>1</sup>, Istvan Horvath<sup>3</sup>, Ludmilla A.  
Morozova-Roche<sup>3</sup>, Philip T.F. Williamson<sup>1†</sup>

<sup>1</sup>Centre for Biological Sciences, University of Southampton, Southampton,  
United Kingdom, SO17 1BJ.

<sup>2</sup>Sector of Amyloid Research, Institute of Biotechnology, Life Sciences Centre,  
Vilnius University, Lithuania.

<sup>3</sup>Department of Medical Biochemistry and Biophysics, Umeå University, Umeå, SE-90187,  
Sweden.

*† Corresponding author*

### Supplementary Information.

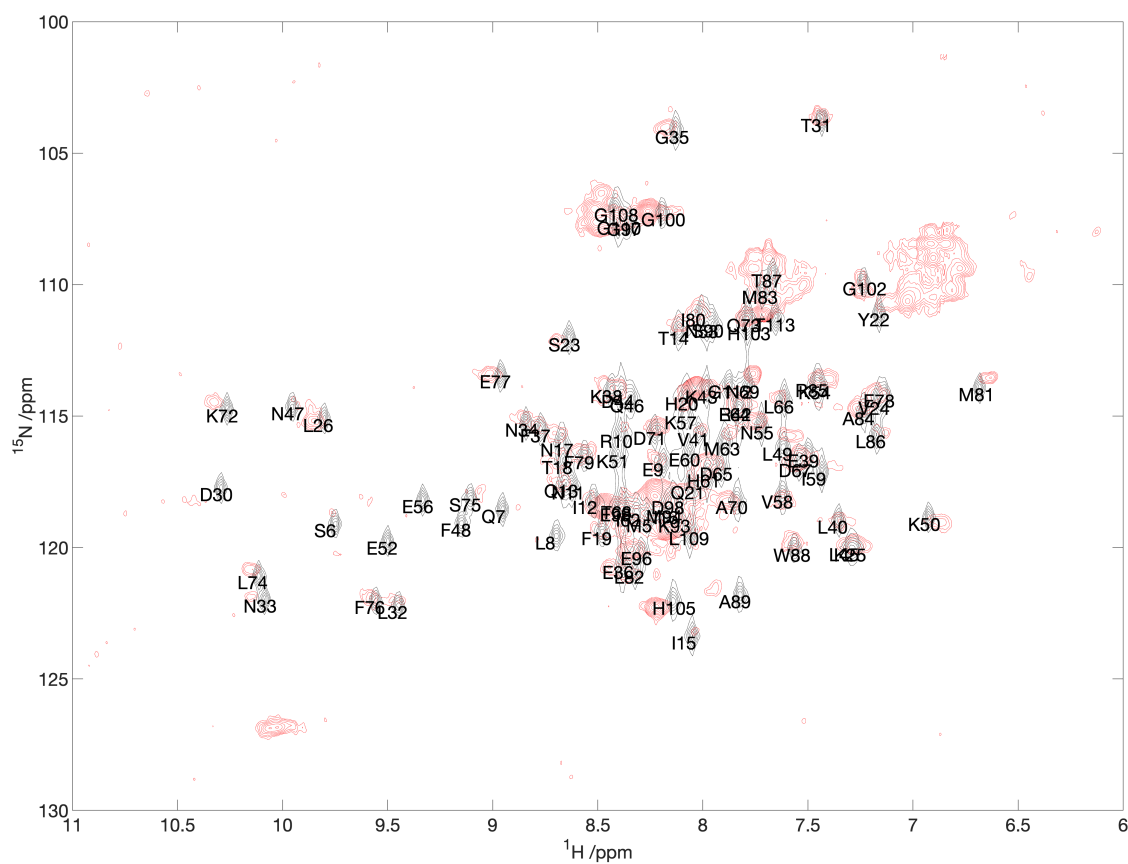

**Supplementary Figure S1.**  $^1\text{H}/^{15}\text{N}$  HSQC spectra of S100A9 (100  $\mu\text{M}$  in 20 mM bisTris buffer pH 7.2) with 4.0 mM  $\text{CaCl}_2$  (red). Simulated  $^1\text{H}/^{15}\text{N}$  HSQC spectrum of the backbone resonances of S100A9 based on the published resonance assignment of S100A9<sup>43</sup> (black).

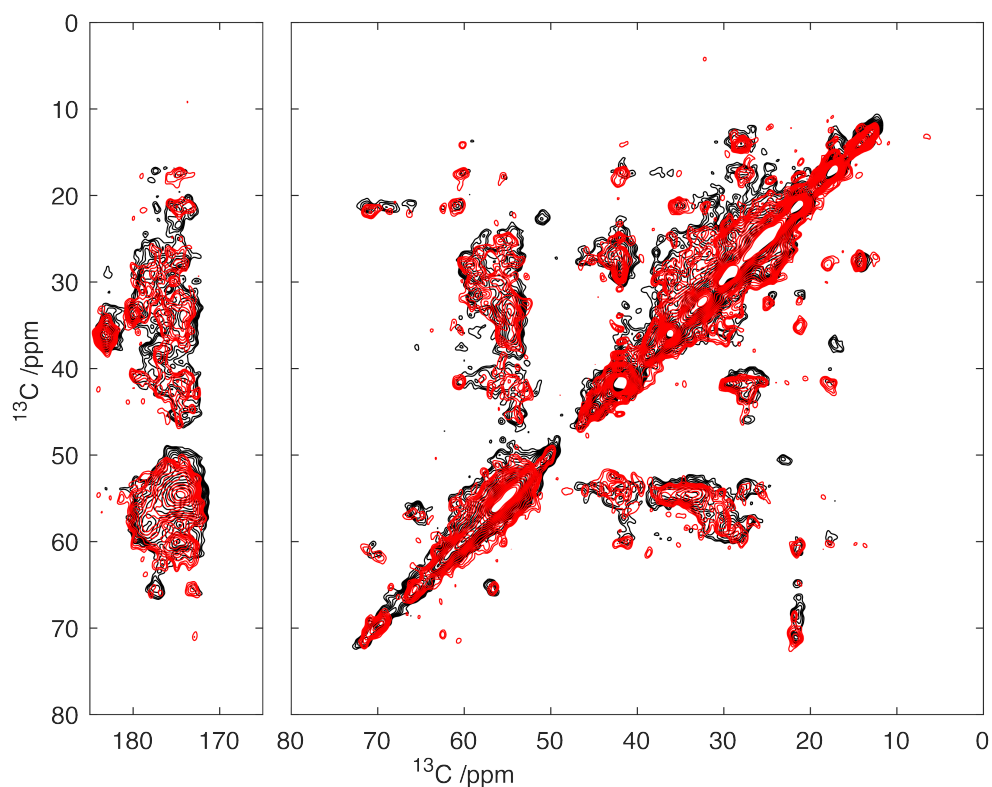

**Supplementary Figure S2.** 2D S100A9 fibril  $^{13}\text{C}/^{13}\text{C}$  DARR spectra (black) overlaid with S100A9 microcrystal  $^{13}\text{C}/^{13}\text{C}$  DARR spectra (red), both with a 25 ms mixing times, and processed with 100 Hz Gaussian broadening. Spectra were acquired at 600 MHz on a DD2 Agilent Spectrometer with 3.2mm MAS probe, spinning at 12.5 kHz. All data obtained at 0°C.
